# Supplementary material for: A Water-Processed Mesoscale Structure Enables 18.5% Efficient Binary Layer-by-Layer Organic Solar Cells
Source: MDPI journal article supplement (doi:10.3390/polym16010091), 2023-12-28
Supplement: s1 [file s1]

# Water-processed mesoscale structure enables 18.5% efficient binary layer-by-layer organic solar cells

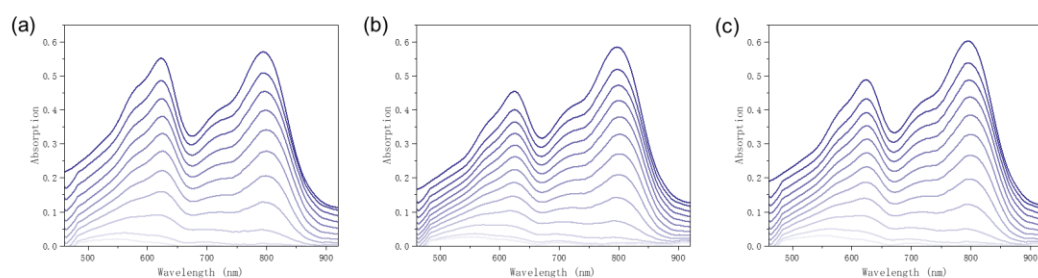

Figure S1. FLAS of (a) BC, (b) LBL and (c) meso-LBL processed PM6:L8-BO films.

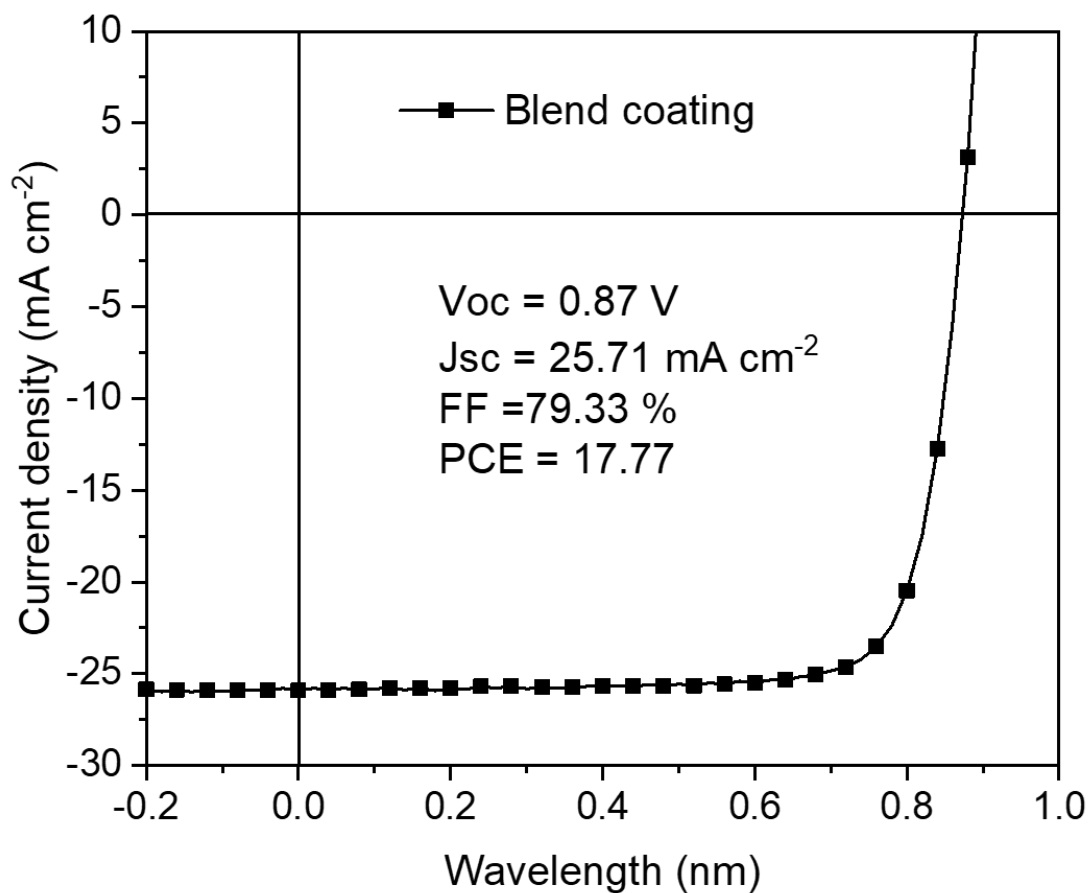

Figure S2. J-V characteristics of blend coating PM6:L8-BO solar cells.

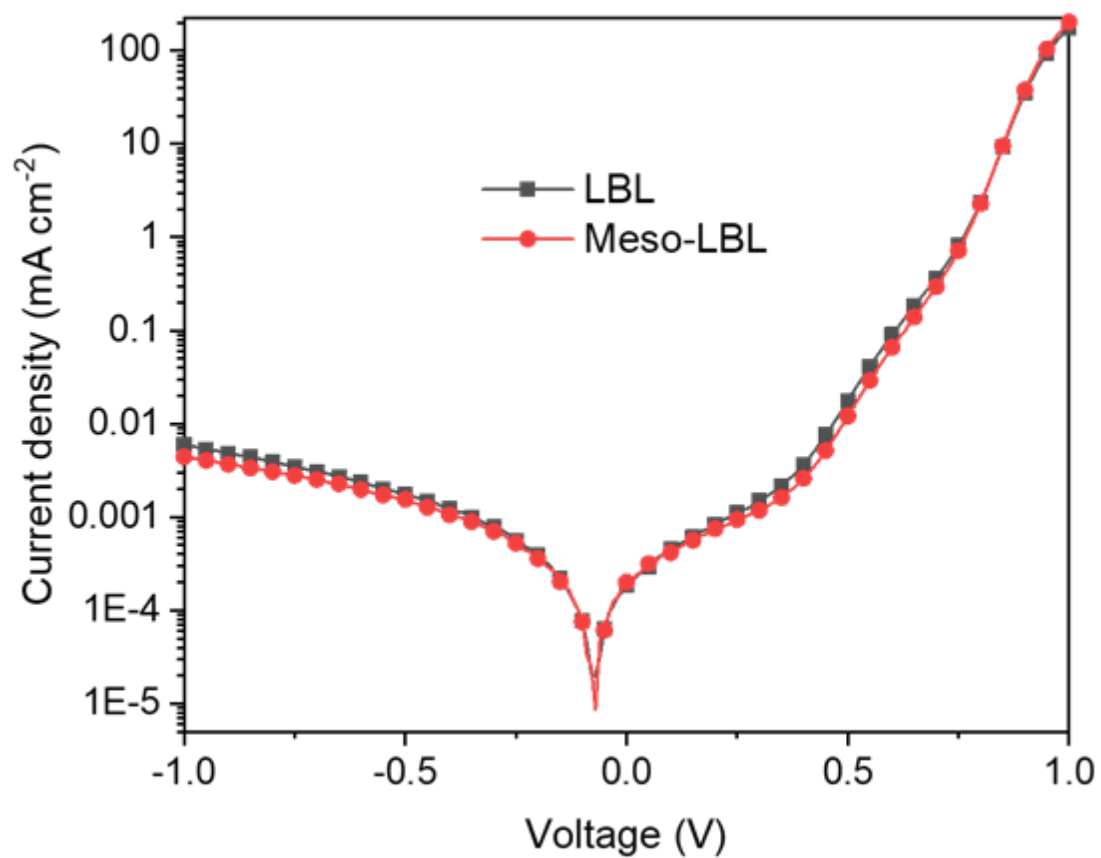

Figure S3. Dark J–V characteristics of PM6/L8-BO conventional LBL and meso-LBL solar cells.
